# Supplementary material
Source: HighWire-hosted journal article supplement (http://jpet.aspetjournals.org/highwire/filestream/145152/field_highwire_adjunct_files/1/260216SupplementalTable.pdf)
Supplement: 260216SupplementalTable.pdf [file 260216SupplementalTable.pdf]

Supplemental Table 1

**Revisiting the pharmacodynamics uroselectivity of Alpha1-Adrenergic Receptor Antagonists**

Bruna Maria Castro Salomão Quaresma, Amanda Reis Pimenta, Anne Caroline Santos da Silva, André Sampaio Pupo, Luiz Antonio S. Romeiro, Claudia Lucia Martins Silva and François Noël\*

Journal of Pharmacology and Experimental Therapeutics

Table 1:  $K_i$  values of the five FDA-approved  $\alpha_1$ -AR antagonists for binding to the three human transfected  $\alpha_1$ -AR subtypes: overview of literature data.

| $\alpha_{1A}$ | $K_i$ (nM) |       |      |      |      |      |      |      |      |
|---------------|------------|-------|------|------|------|------|------|------|------|
|               | (1)        | (2)   | (3)  | (4)  | (5)  | (6)  | (7)  | (8)  | (9)  |
| Tamsulosin    | 0.012      | 0.019 | 0.13 | 0.04 | -    | 0.63 | 0.20 | -    | 0.19 |
| Silodosin     | 0.039      | 0.036 | -    | 0.20 | -    | -    | -    | -    | 0.44 |
| Alfuzosin     | -          | -     | -    | 11.5 | -    | 100  | 10.0 | 6.31 | -    |
| Terazosin     | -          | -     | -    | 4.90 | -    | 126  | -    | 6.92 | 8.71 |
| Doxazosin     | --         | -     | -    | -    | 1.99 | 6.31 | 3.16 | 2.75 | -    |
| $\alpha_{1D}$ |            |       |      |      |      |      |      |      |      |
| Tamsulosin    | 0.03       | 0.06  | 0.18 | 0.14 |      | 0.63 | 0.16 | -    | 0.05 |
| Silodosin     | 2.2        | 2.0   | -    | 5.13 |      | -    | -    | -    | 8.71 |
| Alfuzosin     | -          | -     | -    | 1.99 |      | 10.0 | 3.16 | 3.98 | -    |
| Terazosin     | -          | -     | -    | 2.57 |      | 12.6 | -    | 3.47 | 1.35 |
| Doxazosin     | -          | -     | -    | -    | 1.66 | 7.94 | 3.98 | 1.66 | -    |
| $\alpha_{1B}$ |            |       |      |      |      |      |      |      |      |
| Tamsulosin    | 0.12       | 0.29  | 1.92 | 0.47 | -    | 7.94 | 1.26 | -    | 0.63 |

|           |     |    |   |      |      |      |      |      |      |
|-----------|-----|----|---|------|------|------|------|------|------|
| Silodosin | 6.5 | 21 | - | 5.13 | -    | -    | -    | -    | 10.2 |
| Alfuzosin | -   | -  | - | 1.70 | -    | 12.6 | 10.0 | 2.95 | -    |
| Terazosin | --  | -  |   | 2.40 | -    | 12.6 | -    | 1.95 | 0.46 |
| Doxazosin | -   | -  | - | -    | 0.72 | 6.31 | 1.00 | 1.05 | -    |

(1): Tatemichi et al. 2006; (2) Shibata et al., 1995; (3): Kuo et al., 2000; (4) Sato et al., 2012; (5): Hatano et al. 1996; (6): Richardson et al., 1997, (7) Kenny et al., 1996, (8) Forray et al., 1994 (new nomenclature), (9) Ishiguro et al., 2002.
